# Supplementary material for: Linagliptin Protects against Endotoxin-Induced Acute Kidney Injury in Rats by Decreasing Inflammatory Cytokines and Reactive Oxygen Species
Source: MDPI journal article supplement (doi:10.3390/ijms222011190), 2021-10-17
Supplement: s1 [file s1]

**Table S1.** Primers used in the quantatitave real time polymerase chain reaction analyses.

|                | Forward Primer (5'-3')         | Reverse Primer (5'-3') |
|----------------|--------------------------------|------------------------|
| NF- $\kappa$ B | GCTCAAGATCTGCCGAGTAAAC         | AGCCAGGTCCCGTGAAATA    |
| CCL2           | ACTCACCTGCTGCTACTCATT          | CTACAGCTTCTTTGGGACACCT |
| IL-1 $\beta$   | GCTAG-<br>TGTGTGATGTTCCCATAG   | CATTGAGGTGGAGAGCTTTCAG |
| IL-6           | CAGAGCAATACTGAAACCCTAG-<br>TTC | TTGGTCCTTAGCCACTCCTT   |
| $\beta$ -actin | CATTGCTGACAG-<br>GATGCAGAAGG   | TGCTGGAAGGTGGACAGTGAGG |

## Sepsis-AKI rat model

Wistar-Kyoto rat

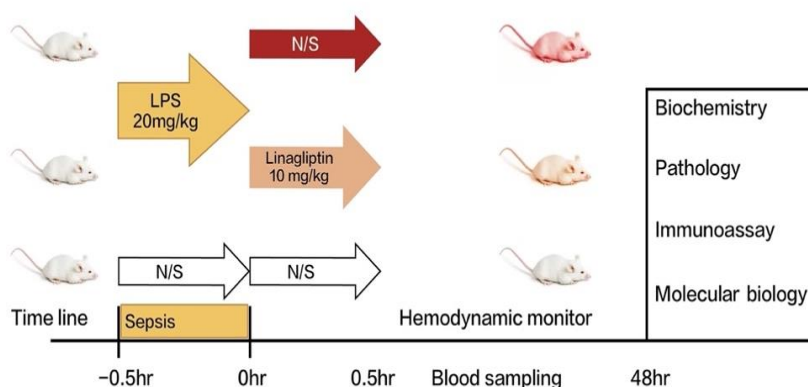

LPS: *Klebsiella pneumoniae* lipopolysaccharide

N/S: 0.9% normal saline

**Figure S1** The animal experiment graphic plan. LPS, *Klebsiella pneumoniae* lipopolysaccharide. N/S, 0.9% normal saline.
